# Supplementary material for: Mitochondrial hTERT rewires glucose metabolism to confer cancer chemoresistance by binding to MT-ND1
Source: Research Square preprint supplement (doi:10.21203/rs.3.rs-1342028/v1), 2022-03-02
Supplement: Supplementary file 1 [file 2d3bfe6b0948427d6837b097.xlsx]

## Sheet: Sheet1
Supplementary Table S3. Patients information in Figure 6
Sample	ID Number	Name	Sex	Age	Diagnosis
29	8001522639	Luo Derong	Female	46	primary hepatocellular carcinoma
31	8001540679	Wang Qi	Female	28	primary hepatocellular carcinoma
35	8001555167	Liu Hongbo	Male	39	primary hepatocellular carcinoma
